# Supplementary material for: Comparison of Fc N-Glycosylation of Pharmaceutical Products of Intravenous Immunoglobulin G
Source: PubMed Central journal article supplement (PMC4601728; doi:10.1371/journal.pone.0139828), 2015-10-12
Supplement: pone.0139828.s002.pdf [file pone.0139828.s002.pdf]

**Supplementary figure 2.** Differences between IVIg preparations in respect of four glycosylation features for IgG1 (A-D) and three features for IgG2/3 (E-G). Tested with ANOVA and a post-hoc Tukey Test.

Legend:

|  |                |
|--|----------------|
|  | P > 0.05       |
|  | P 0.05 - 0.01  |
|  | P 0.01 - 0.001 |
|  | P < 0.001      |

**A** IgG1 Galactosylation

| IVIg preparation: | 1A | 1B | 2A | 2B | 3 | 4 | 5 | IVIg ctrl |
|-------------------|----|----|----|----|---|---|---|-----------|
| 1A                | X  |    |    |    |   |   |   |           |
| 1B                |    | X  |    |    |   |   |   |           |
| 2A                |    |    | X  |    |   |   |   |           |
| 2B                |    |    |    | X  |   |   |   |           |
| 3                 |    |    |    |    | X |   |   |           |
| 4                 |    |    |    |    |   | X |   |           |
| 5                 |    |    |    |    |   |   | X |           |
| IVIg control      |    |    |    |    |   |   |   | X         |

**B** IgG1 Sialylation

| IVIg preparation: | 1A | 1B | 2A | 2B | 3 | 4 | 5 | IVIg ctrl |
|-------------------|----|----|----|----|---|---|---|-----------|
| 1A                | X  |    |    |    |   |   |   |           |
| 1B                |    | X  |    |    |   |   |   |           |
| 2A                |    |    | X  |    |   |   |   |           |
| 2B                |    |    |    | X  |   |   |   |           |
| 3                 |    |    |    |    | X |   |   |           |
| 4                 |    |    |    |    |   | X |   |           |
| 5                 |    |    |    |    |   |   | X |           |
| IVIg control      |    |    |    |    |   |   |   | X         |

**C** IgG1 Bisecting GlcNAc

| IVIg preparation: | 1A | 1B | 2A | 2B | 3 | 4 | 5 | IVIg ctrl |
|-------------------|----|----|----|----|---|---|---|-----------|
| 1A                | X  |    |    |    |   |   |   |           |
| 1B                |    | X  |    |    |   |   |   |           |
| 2A                |    |    | X  |    |   |   |   |           |
| 2B                |    |    |    | X  |   |   |   |           |
| 3                 |    |    |    |    | X |   |   |           |
| 4                 |    |    |    |    |   | X |   |           |
| 5                 |    |    |    |    |   |   | X |           |
| IVIg control      |    |    |    |    |   |   |   | X         |
